# Supplementary material for: Multidrug-eluting bi-layered microparticle-mesh scaffolds for musculoskeletal tissue regeneration
Source: Royal Society of Chemistry journal article supplement (doi:10.1039/c8tb00397a), 2018-01-01
Supplement: c8tb00397a1.pdf [file c8tb00397a1.pdf]

### Supplementary Figures

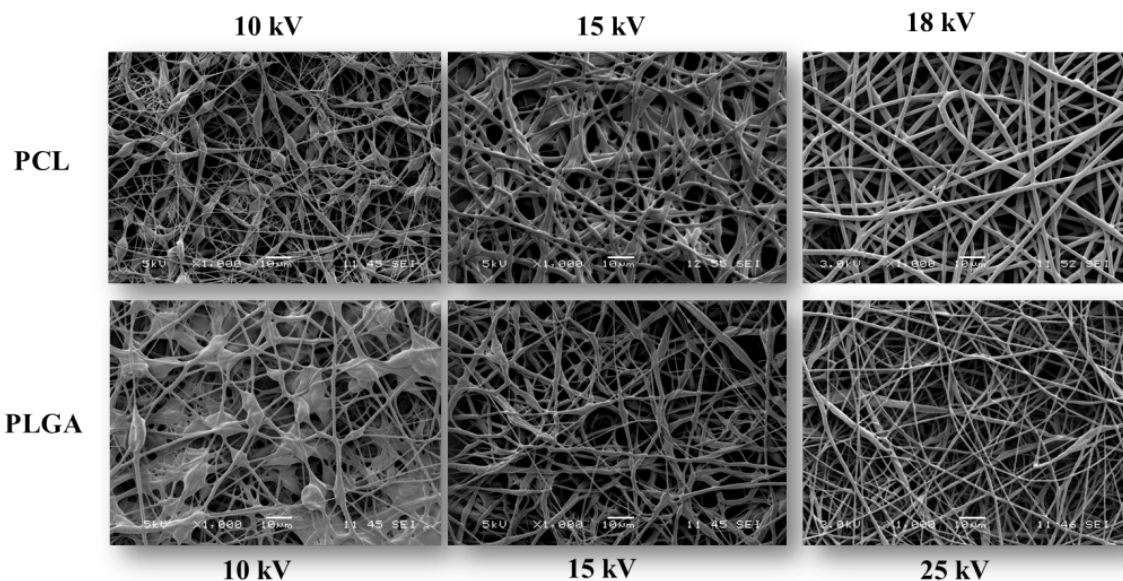

**Figure S1** Electrospun fibers of PCL (top row) and PLGA (bottom row) at various voltages showing the gradual disappearance of beading to form uniform fibers.

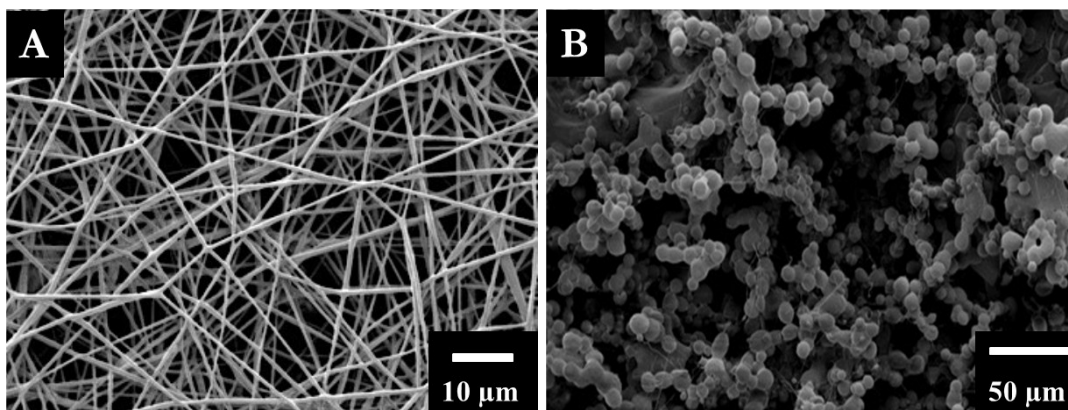

**Figure S2** Scanning Electron Micrograph of (A) electrospun PLGA:PCL nanofibrous mesh and (B) electrospayed PLGA microparticles.

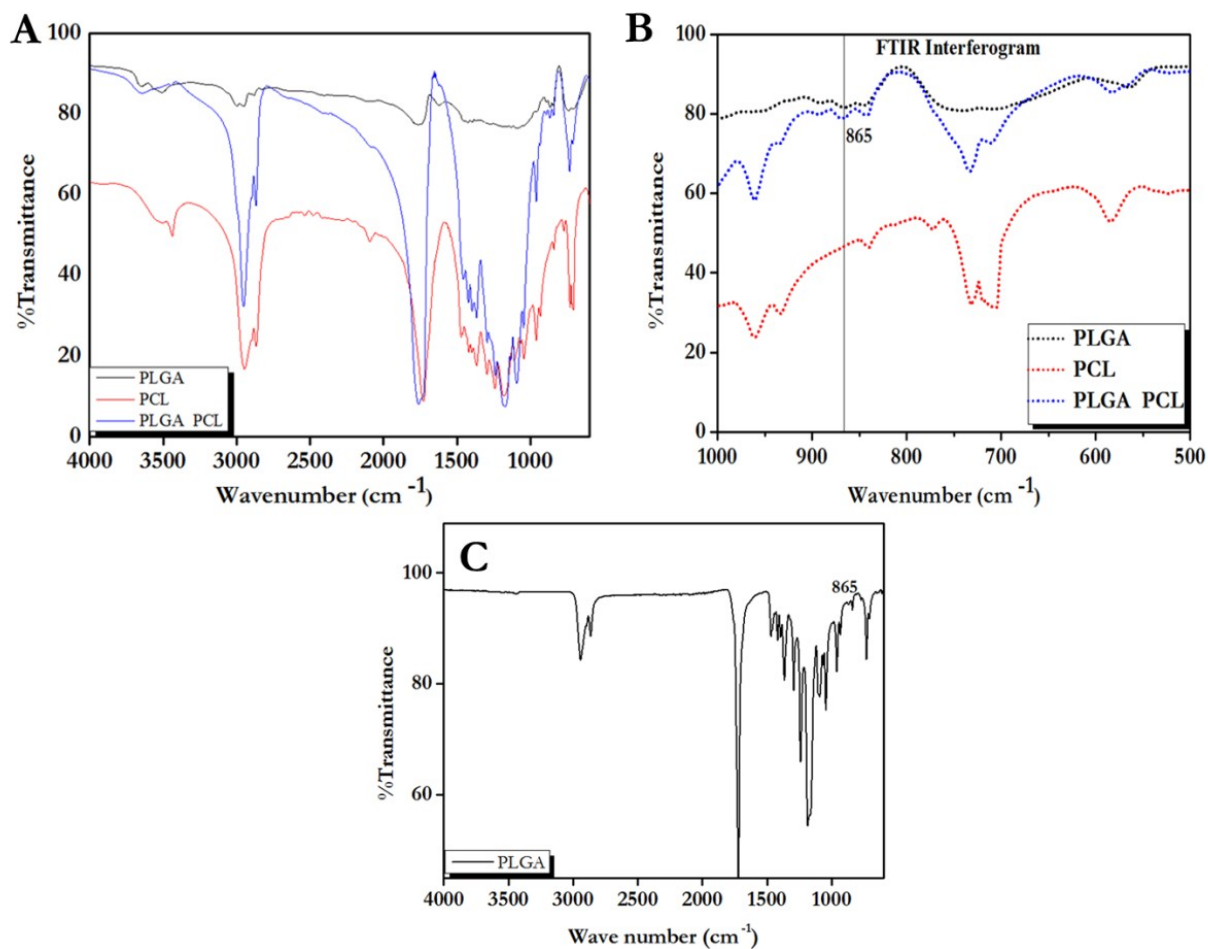

**Figure S3** FTIR spectra of (A) PLGA, PCL and its physical blend (PLGA:PCL) and (B) Zoomed image revealing peak at  $865 \text{ cm}^{-1}$  for PLGA (C) FTIR spectrum of the PLGA microparticles.

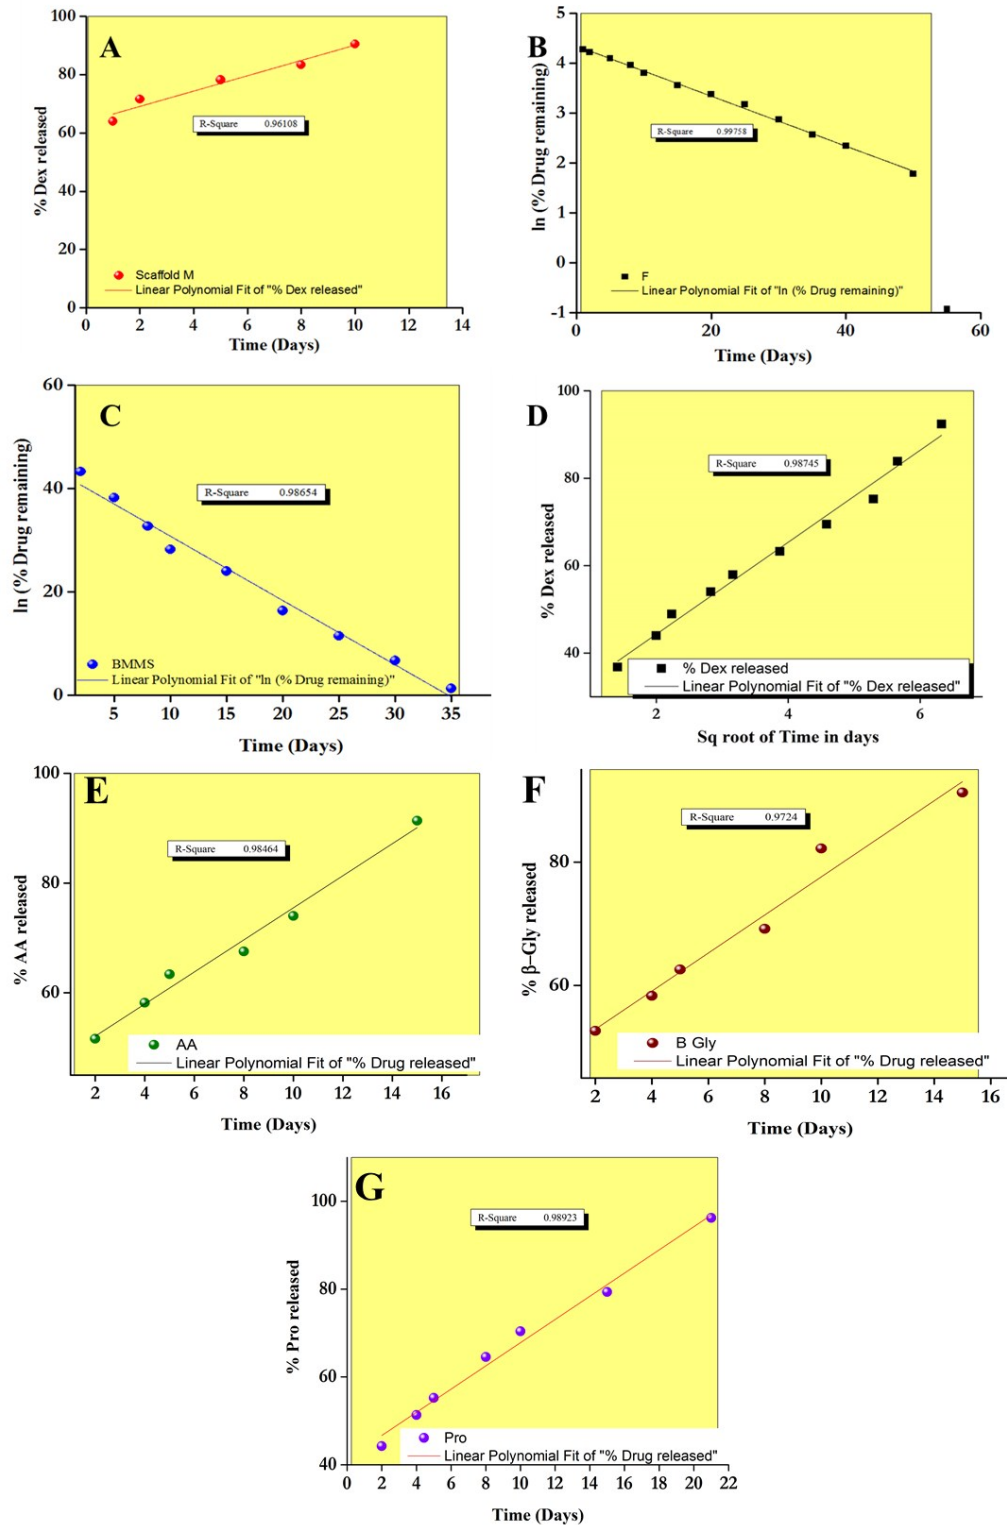

**Figure S4** Kinetics of Dex release from all three scaffold systems. (A) The release of Dex from scaffold M follows zero order kinetics with  $R^2 = 0.96$ . (B) Scaffold F follows a first order kinetic profile exhibiting a correlation coefficient  $R^2 = 0.99$ . (C) Release

of Dex from BMMS exhibits a first order kinetics with a  $R^2 = 0.98$ . (D) Release of Dex from BMMS when encapsulated along with hydrophilic molecules exhibits a  $R^2 = 0.98$ . (E-G) Zero order release kinetics was exhibited by AA (E),  $\beta$  Gly (F) and Pro (G) encapsulated in the microparticles of BMMS [ $R^2 = 0.98$ ]. In all the cases, the initial burst release of the drug was not taken into account to evaluate the release kinetics.

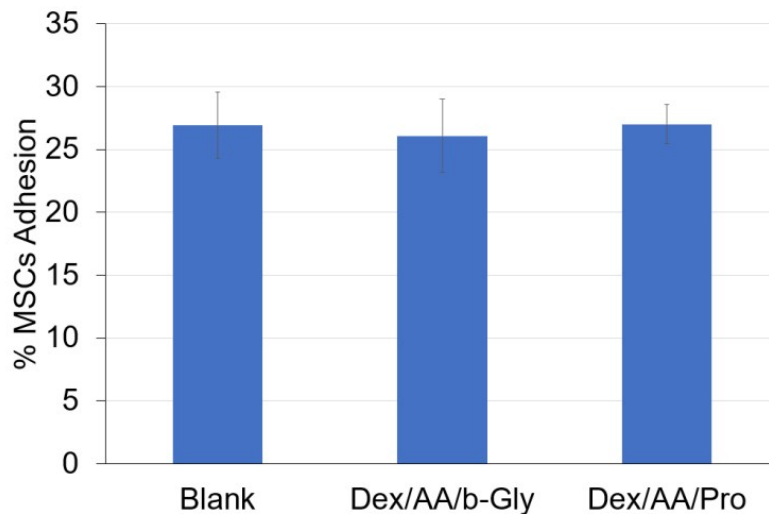

**Figure S5** MSCs adhesion study on the blank and bioactive scaffolds.

**List of Tables**

**Table S1** Polymer concentrations and solvent ratios used for electrospinning and solvent ratios used for electrospinning.

| <b>PLGA:PCL fibers</b>                            |                                     |       |       |       |       |
|---------------------------------------------------|-------------------------------------|-------|-------|-------|-------|
| <b>Polymer ratio at<br/>12% conc<br/>PLGA:PCL</b> | <b>Solvent ratio<br/>[DCM/MeOH]</b> |       |       |       |       |
| 30:70                                             | 90:10                               | 80:20 | 50:50 | 20:80 | 90:10 |
| 50:50                                             | 90:10                               | 80:20 | 50:50 | 20:80 | 90:10 |
| 70:30                                             | 90:10                               | 80:20 | 50:50 | 20:80 | 90:10 |
| <b>PLGA Particles (3% polymer concentration)</b>  |                                     |       |       |       |       |
| <b>Solvent Ratio [CHL/DMF]</b>                    |                                     |       |       |       |       |
| 90:10                                             | 80:20                               | 50:50 | 20:80 | 90:10 |       |

**Table S2** Primer sequences used in real time PCR

| Gene                                             | Accession number | Primer sequence (both 5'-3')                            | Product size |
|--------------------------------------------------|------------------|---------------------------------------------------------|--------------|
|                                                  | NM_000088        | F: CAGCCGCTT CACCTACAGC<br>R: TTTTGTATTCAATCACTGTCTTGCC | 83           |
| Collagen Type II (Col II)                        | NM_001844        | F: GGCAATAGCAGGTTACGTACA<br>R: CGATAACAGTCTTGCCCCACTT   | 79           |
| Aggrecan (AGG)                                   | NM_001135        | F: ACTTCCGCTGGTCAGATGGA<br>R: TCTCGTGCCAGATCATCACC      | 111          |
| Glyceraldehyde 3-phosphate dehydrogenase (GADPH) | NM_002046        | F: ATGGGGAAGGTGAAGGTCG<br>R: TAAAAGCAGCCCTGGTGACC       | 70           |

**Table S3** Percentage weight loss exhibited by the scaffolds when subjected to PBS for a period for seven weeks.

| Day | Initial weight (mg) | Dry weight of degraded sample (mg) | Weight Loss (%) |
|-----|---------------------|------------------------------------|-----------------|
| 1   | 8.25 ± 0.44         | 8.25 ± 0.57                        | 0.20 ± 0.13     |
| 15  | 8.33 ± 0.92         | 7.01 ± 0.15                        | 15.77 ± 1.55    |
| 45  | 9.52 ± 0.30         | 4.33 ± 1.26                        | 53.12 ± 1.56    |

**Table S4** lists the Encapsulation Efficiency of Dex (1 % w/w) when encapsulated alone (n=6).

| Weight of the scaffold (mg) | Theoretical amount of encapsulated Dex (µg) | Actual Dex detected (µg) | Encapsulation Efficiency (%) |
|-----------------------------|---------------------------------------------|--------------------------|------------------------------|
| 20                          | 200                                         | 163.82                   | 78.04 ± 3.36                 |
| 20                          | 200                                         | 151.75                   |                              |
| 20                          | 200                                         | 152.69                   |                              |
| 25                          | 250                                         | 214.77                   | 86.37 ± 2.70                 |
| 25                          | 250                                         | 223.19                   |                              |
| 25                          | 250                                         | 209.83                   |                              |

**Table S5** Encapsulation Efficiencies for all the biomolecules employed in this study.

| Biomolecule        | Incorporated into              |                  |
|--------------------|--------------------------------|------------------|
|                    | Microparticles                 | Nanofibrous mesh |
|                    | Encapsulation Efficiency (EE)% |                  |
| Dexamethasone      | n/a                            | 83 ± 5.24        |
| Ascorbic acid      | 62 ± 7.5                       | n/a              |
| β-Glycerophosphate | 72 ± 3.3                       | n/a              |
| Proline            | 88 ± 0.51                      | n/a              |
